# Supplementary material
Source: Springer Nature journal article supplement (https://www.springermedizin.de/resource/supplementary/12936_2006_384_MOESM2_ESM.pdf/9547698)
Supplement: MOESM2 [file 9547698]

## Additional File 2.

### Percentage of participants achieving sensitivity and specificity cut points on initial examination

| <i>Sensitivity/Specificity</i> |     |       |       |       |       |       |       |         |        |       |       |         |         |
|--------------------------------|-----|-------|-------|-------|-------|-------|-------|---------|--------|-------|-------|---------|---------|
|                                | n   | 80/80 | 80/85 | 80/90 | 80/95 | 85/90 | 85/95 | 85/97.5 | 85/100 | 90/90 | 90/95 | 90/97.5 | 95/97.5 |
| Kenya Research Organizations   | 55  | 55%   | 47%   | 40%   | 29%   | 31%   | 20%   | 20%     | 20%    | 31%   | 20%   | 20%     | 13%     |
| Other Country Research Org     | 14  | 21%   | 14%   | 14%   | 7%    | 14%   | 7%    | 7%      | 7%     | 14%   | 7%    | 7%      | 0%      |
| Malaria Control Program        | 6   | 67%   | 67%   | 33%   | 33%   | 17%   | 17%   | 17%     | 17%    | 17%   | 17%   | 17%     | 0%      |
| Teaching Staff                 | 2   | 0%    | 0%    | 0%    | 0%    | 0%    | 0%    | 0%      | 0%     | 0%    | 0%    | 0%      | 0%      |
| Private Clinics/Hospitals      | 11  | 18%   | 18%   | 9%    | 0%    | 9%    | 0%    | 0%      | 0%     | 9%    | 0%    | 0%      | 0%      |
| Government Clinics/Hospitals   | 12  | 25%   | 8%    | 0%    | 0%    | 0%    | 0%    | 0%      | 0%     | 0%    | 0%    | 0%      | 0%      |
| Total                          | 100 | 42%   | 35%   | 27%   | 19%   | 21%   | 13%   | 13%     | 13%    | 21%   | 13%   | 13%     | 7%      |
| Long Course                    | 77  | 32%   | 25%   | 18%   | 13%   | 14%   | 9%    | 9%      | 9%     | 14%   | 9%    | 9%      | 4%      |
| Short Course                   | 23  | 74%   | 70%   | 57%   | 39%   | 43%   | 26%   | 26%     | 26%    | 43%   | 26%   | 26%     | 17%     |

### Percentage of participants achieving sensitivity and specificity cut points on final examination

| <i>Sensitivity/Specificity</i> |     |       |       |       |       |       |       |         |        |       |       |         |         |
|--------------------------------|-----|-------|-------|-------|-------|-------|-------|---------|--------|-------|-------|---------|---------|
|                                | n   | 80/80 | 80/85 | 80/90 | 80/95 | 85/90 | 85/95 | 85/97.5 | 85/100 | 90/90 | 90/95 | 90/97.5 | 95/97.5 |
| Kenya Research Organizations   | 55  | 85%   | 84%   | 78%   | 60%   | 67%   | 51%   | 51%     | 51%    | 67%   | 51%   | 51%     | 29%     |
| Other Country Research Org     | 14  | 64%   | 57%   | 57%   | 36%   | 50%   | 29%   | 29%     | 29%    | 50%   | 29%   | 29%     | 14%     |
| Malaria Control Program        | 6   | 83%   | 83%   | 83%   | 50%   | 67%   | 33%   | 33%     | 33%    | 67%   | 33%   | 33%     | 17%     |
| Teaching Staff                 | 2   | 50%   | 50%   | 0%    | 0%    | 0%    | 0%    | 0%      | 0%     | 0%    | 0%    | 0%      | 0%      |
| Private Clinics/Hospitals      | 11  | 73%   | 55%   | 55%   | 27%   | 55%   | 27%   | 27%     | 27%    | 55%   | 27%   | 27%     | 9%      |
| Government Clinics/Hospitals   | 12  | 50%   | 42%   | 25%   | 25%   | 17%   | 17%   | 17%     | 17%    | 17%   | 17%   | 17%     | 0%      |
| Total                          | 100 | 75%   | 70%   | 64%   | 47%   | 55%   | 39%   | 39%     | 39%    | 55%   | 39%   | 39%     | 20%     |
| Long Course                    | 77  | 71%   | 65%   | 58%   | 43%   | 48%   | 32%   | 32%     | 32%    | 48%   | 32%   | 32%     | 16%     |
| Short Course                   | 23  | 91%   | 91%   | 87%   | 61%   | 83%   | 61%   | 61%     | 61%    | 83%   | 61%   | 61%     | 35%     |

### Percent improvement of participants in achieving sensitivity and specificity cut points

| <i>Sensitivity/Specificity</i> |     |       |       |       |       |       |       |         |        |       |       |         |         |
|--------------------------------|-----|-------|-------|-------|-------|-------|-------|---------|--------|-------|-------|---------|---------|
|                                | n   | 80/80 | 80/85 | 80/90 | 80/95 | 85/90 | 85/95 | 85/97.5 | 85/100 | 90/90 | 90/95 | 90/97.5 | 95/97.5 |
| Kenya Research Organizations   | 55  | 31%   | 36%   | 38%   | 31%   | 36%   | 31%   | 31%     | 31%    | 36%   | 31%   | 31%     | 16%     |
| Other Country Research Org     | 14  | 43%   | 43%   | 43%   | 29%   | 36%   | 21%   | 21%     | 21%    | 36%   | 21%   | 21%     | 14%     |
| Malaria Control Program        | 6   | 17%   | 17%   | 50%   | 17%   | 50%   | 17%   | 17%     | 17%    | 50%   | 17%   | 17%     | 17%     |
| Teaching Staff                 | 2   | 50%   | 50%   | 0%    | 0%    | 0%    | 0%    | 0%      | 0%     | 0%    | 0%    | 0%      | 0%      |
| Private Clinics/Hospitals      | 11  | 55%   | 36%   | 45%   | 27%   | 45%   | 27%   | 27%     | 27%    | 45%   | 27%   | 27%     | 9%      |
| Government Clinics/Hospitals   | 12  | 25%   | 33%   | 25%   | 25%   | 17%   | 17%   | 17%     | 17%    | 17%   | 17%   | 17%     | 0%      |
| Total                          | 100 | 33%   | 35%   | 37%   | 28%   | 34%   | 26%   | 26%     | 26%    | 34%   | 26%   | 26%     | 13%     |
| Long Course                    | 77  | 39%   | 40%   | 40%   | 30%   | 34%   | 23%   | 23%     | 23%    | 34%   | 23%   | 23%     | 12%     |
| Short Course                   | 23  | 17%   | 22%   | 30%   | 22%   | 39%   | 35%   | 35%     | 35%    | 39%   | 35%   | 35%     | 17%     |
